# Supplementary material for: The immune gene repertoire of an important viral reservoir, the Australian black flying fox
Source: PubMed Central journal article supplement (PMC3436859; doi:10.1186/1471-2164-13-261), 2012-06-20
Supplement: 1471-2164-13-261-S1.pdf [file 1471-2164-13-261-S1.pdf]

# Summary of additive multiple-kmer velvet/oases/mira3 assembly

|                                         | SRA: SRR350710.3 (Thymus)                |                                         |                | SRA: SRR351237.2 (Pooled)                |                                         |                |
|-----------------------------------------|------------------------------------------|-----------------------------------------|----------------|------------------------------------------|-----------------------------------------|----------------|
|                                         | velvet<br>additive 21-<br>31mer<br>cov>1 | Oases<br>additive 19-<br>31mer<br>Cov>3 | Mira3<br>Cov>2 | velvet<br>additive 21-<br>31mer<br>cov>1 | Oases<br>additive 19-<br>31mer<br>Cov>3 | Mira3<br>Cov>2 |
| <b># contigs<br/>/loci</b>              | 956,834                                  | 247,909                                 | 497,582        | 740,279                                  | 313,641                                 | 780,325        |
| <b>Longest<br/>transcripts<br/>(kb)</b> | 4.8                                      | 11.8                                    | 8.0            | 1.3                                      | 8.9                                     | 7.5            |
| <b>N50</b>                              | 164                                      | 1244                                    | 131            | 122                                      | 733                                     | 103            |
| <b>Coverage<br/>1~3</b>                 | 64.8%                                    | 0                                       | /              | 51.7%                                    | 0                                       | /              |
| <b>% reads<br/>used in<br/>assembly</b> | 73.5                                     | 74.0                                    | 81.6           | 48.2                                     | 50.0                                    | 69.8           |
