# Supplementary material for: The immune gene repertoire of an important viral reservoir, the Australian black flying fox
Source: PubMed Central journal article supplement (PMC3436859; doi:10.1186/1471-2164-13-261), 2012-06-20

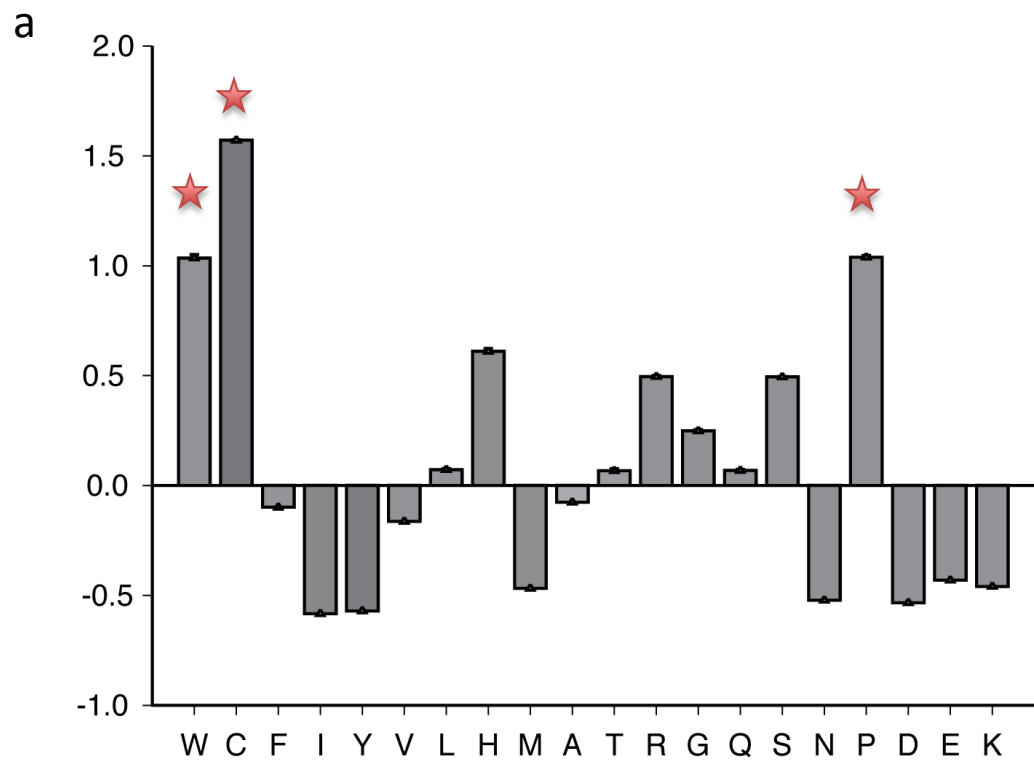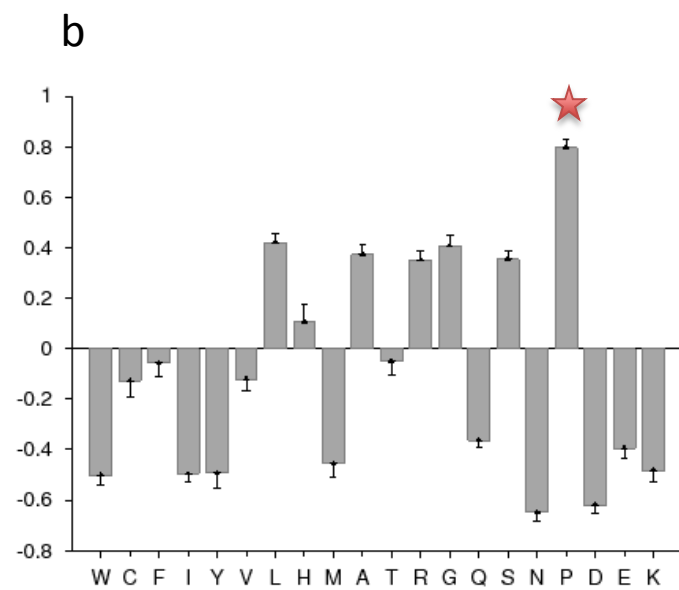

Supplement: 1471-2164-13-261-S4.pdf [file 1471-2164-13-261-S4.pdf]
