# Supplementary material for: The immune gene repertoire of an important viral reservoir, the Australian black flying fox
Source: Springer Nature journal article supplement (doi:10.1186/1471-2164-13-261), 2012-06-20
Supplement: 12864_2012_4137_MOESM9_ESM.pdf [file 12864_2012_4137_MOESM9_ESM.pdf]

A

Cytoplasmic domain  
 . . . . . 10 . . . . . 20 . . . . . 30 . . . . . 40 . . . . . 50 . . . . . 60 . . . . . 70  
 Locus27\_6364\_4/5 MSNQGVTYAEINLVAKYSKGGQLKFKGTRSSISVSEQETIYAEINLQDASQDLQGNDEKFKCKALFSPFPEK  
 Locus31mer\_10008\_2/3 . . . . . E--I-----A-T--Y  
 Human NKG2A -D---I-SD--LPPNF-R--R---N---LAT-----K---F---RTY---D---A---  
 Human NKG2C -NK-RG-FS-VSL-QDF-R--R---N---GT---FQV---NF-LNH--I-KIYD-QG-LP---  
 Mouse NKG2A ---ER-----K--N-RN-HR--R-PR---I---I-SDFSP-NF--EHEWICRNCF--GF-----  
 Mouse NKG2C ---HLLG---EQ-SEFRKATK-TQAQFRFSNAAGDRLL--FS--H---KHLKASRHGY--NFA----

Transmembrane domain                      Stalk  
 . . . . . 70 . . . . . 80 . . . . . 90 . . . . . 100 . . . . . 110 .  
 Locus27\_6364\_4/5 LIAGILGVICLVMSITVWIIIAVIPS.TLN PEQNNSSSVTGIQK.....AYHCGR  
 Locus31mer\_10008\_2/3 -----L-----  
 Human NKG2A --V---I---IL-AS--T-V-----I QRH---LN-RI-----R---H  
 Human NKG2C -T-EV-I--I-L-A--LKTII-LIP-F-E Q...F-PN-RI-----R---H  
 Mouse NKG2A ----T--L--F-LIVA--V-TTVATPYTE AKAQIN--M-RTHRDDNYILSS-QF-PH  
 Mouse NKG2C -----T-WFTLLIAL--STR-V-PYAE LKKQIHFFLVRI--GSHALLSK-QF-PH

Extracellular C type lectin domain  
 .130. . .140. . .150. . .160. . .170. . .180. . .190. . .200. . .210. . .220. . .230. . .240  
 Locus27\_6364\_4/5 CPKEWETYSNNKYFSTKRRKIWNESLIACASKNSNLLYIDNEEEMFLNSLYLPSWIGVYRKS3DQPWMSKSGSNFTLKIAGSSSSQLNCALLSSSG.....  
 Locus31mer\_10008\_2/3 -----FTASDCGSPKSPCKRRI  
 Human NKG2A --E--I---S---IGKE-R--E---L-T---S--S-----SIIISPS---F-N--HH--VDN-LA-KHE-KD-DNAE---V-QVNRLKSAQCGSSIIYHCKHKL  
 Human NKG2C --E--I---S---IGKE-R--E---L-T---S--S-----A-ILPS---F-N--HH--VTIN-LA-KH--KD-DNAE---V-QVNRLKSAQCGSSMIYHCKHKL  
 Mouse NKG2A ----IS--H---FIGME--S--D--VS-I---CS---S---QD--Q--S-I--T-IL--GRG---VW-ED-I-KP---EILHDEC---M-A--LTDNCTTLHPYLCKCKF  
 Mouse NKG2C ----IS--H---FIGME--S--D--GS-L---CS--H--S---QD--Q--S-V--T-IL--GRG-A-DW-KD-I-KP---EI-HDEC---M-A--LTDNCTTLHPYLCKCKF

B

Cytoplasmic                      Transmembrane                      Stalk  
 . . . . . 10 . . . . . 20 . . . . . 30 . . . . . 40 . . . . . 50 . . . . . 60  
 Locus27\_12788\_2/5 MAGFQTT                      FWRLLSGILGVMLVIMATLVMLRNN                      LFTQSSIQQTTPSPGNLEPQKDS...S  
 Locus19\_68150\_1/1 . . . . . G--LKF                      SV-KS-S-P---E-T---EG-GCCP  
 Human --V-K--                      L-----T--II--S-----GI-LK-                      S--KL--EPAFT---I-L---DCC-  
 Mouse --VSRI-                      R--M-V-F-IK--F--V--GV-LI-                      S--I-N--S---TTIV-F-EV-ECGV  
 \*4

Extracellular C type lectin domain  
 . . . . . 70 . . . . . 80 . . . . . 90 . . . . . 100 . . . . . 110 . . . . . 120 .  
 Locus27\_12788\_2/5 CCKMWTGYCCNYFISNETITWEEKDFCASKNSLLQLQNKDELDFMNHISELFYWIGLSYNKERSA  
 Locus19\_68150\_1/1 --EK-I--R-----K--A--RN--Q-----K-R--S-IKSN-IA-----F---DHR-  
 Human --EK-V--R-----S-QK--N--RHL--QK-----T-----SSS-QQ-----SE-HT-  
 Mouse --LDK-V-H--R-----K-EKS--R-R--Q-----P-SRN--S---FS-QT-F---MH-SEK-N-

Extracellular C type lectin domain  
 .130. . .140. . .150. . .160. . .170. . .180  
 Locus27\_12788\_2/5 WLWEDGSALSQTLFSLRLRTVNISSIVYSSNEGFLDEPREGMRFIKQQLI  
 Locus19\_68150\_1/1 -V--EC-----  
 Human -----N-----Y--PSFE-F-IK--A-NP-GNA---S-EDKN-Y-----  
 Mouse -----TVP-KD--PEFSVIRPEH-----PSKSVSA-S-ENKN-Y--KLP-
