# Supplementary material for: The immune gene repertoire of an important viral reservoir, the Australian black flying fox
Source: Springer Nature journal article supplement (doi:10.1186/1471-2164-13-261), 2012-06-20
Supplement: 12864_2012_4137_MOESM10_ESM.pdf [file 12864_2012_4137_MOESM10_ESM.pdf]

**Leader peptide**

```

      . . . . . -10 . . . . . -20 .
Locus23_971_3/5      ...MGLVAPRTLLLLLLALLETWA
Locus3lmer_4890_1/2  .....,-----
Locus23_2912_1/1    ...--HRTL--PGA-V-----
Locus25_954_6/8     .....,-----
Locus25_954_8/8     .....,-----
Locus25_954_1/8     .....,-----
Locus27_2413_4/9    .....,-----
Human HLA-A         MAV-APRTLVL--SGA---Q---

```

**Alpha 1 domain**

```

      . . . . . 10 . . . . . 20 . . . . . 30 . . . . . 40 . . . . . 50 . . . . . 60 . . . . . 70 . . . . . 80 . . . . . 90 . . . . . 100 . . . . . 110 . . . . . 120
Locus23_971_3/5      GFHSLRYFYTAMSRPDSCEPRFLVVGYYDDTQFERFSDAASPRVETQAPWMRQVEQEPEPCYRDRNTRIYKNTARTARGSLNILRSYVYQSEAAER*GARVQVTTPIPIQDSDSPV*ASPR
Locus3lmer_4890_1/2  .....,-----
Locus23_2912_1/1    ---M--F-SW--C---VA-----L---N---A-PR---DL---QD-Q---H--NARDI-QDF-VG-DDVLR-----
Locus25_954_6/8     .---Y--W-Q-G---T--IS-S-----S---N---A-PR---DL---QD-Q-WE---NARDA-Q-Y-VN-QTALR-----
Locus25_954_8/8     .....,-----V---N---A-PR---DL---QD-Q-WE---NARDA-Q-Y-VN-QTALR-----
Locus25_954_1/8     .....,-----V-----
Locus27_2413_4/9    ...EVFLHGHVPA--R-----T-----
Human HLA-A         -S--M---SV--GR---IA-----V-----R-M-PR--I...-C-E-W-GE--KVKHSQ-H-VD-GT--C-----

```

**Alpha 2 domain**

```

      . . . . . 130 . . . . . 140 . . . . . 150 . . . . . 160 . . . . . 170 . . . . . 180 . . . . . 190 . . . . . 200 . . . . . 210
Locus23_971_3/5      GSHSLQRWVGCDCVPGDGRLLRGYDQFAYDGDADYIALNEDLRSGWTAADLAAQNTRRKWEETRWAERLPAYLE.....
Locus21_1045_7/7     ---TY--Y-----V-----R-L--AGE--HW-----GECVEWLRPKSLENGKETLLRA
Locus27_1722_5/8     ---RY-WLS-----GT.....
Locus29_1706_1/4     ---TI-L-L-----L-----
Locus29_1706_2/4     ---T-L-----
Locus29_1706_4/4     ---TI-L-L-----
Locus31_1745_2/4     ---T-L-----R--AGE--HW-----
Locus31_1745_4/4     ---TI-L-H-----R--AGE--HW-----
Locus23_971_4/5     .C-T-----
Human HLA-A         ---T--Y---S-W-F--H-Y--K---K---M--T-K---AAHV--QW---GTCVEWLRPRYLENGKETLQRT

```
