# Supplementary material for: The immune gene repertoire of an important viral reservoir, the Australian black flying fox
Source: Springer Nature journal article supplement (doi:10.1186/1471-2164-13-261), 2012-06-20
Supplement: 12864_2012_4137_MOESM11_ESM.pdf [file 12864_2012_4137_MOESM11_ESM.pdf]

A

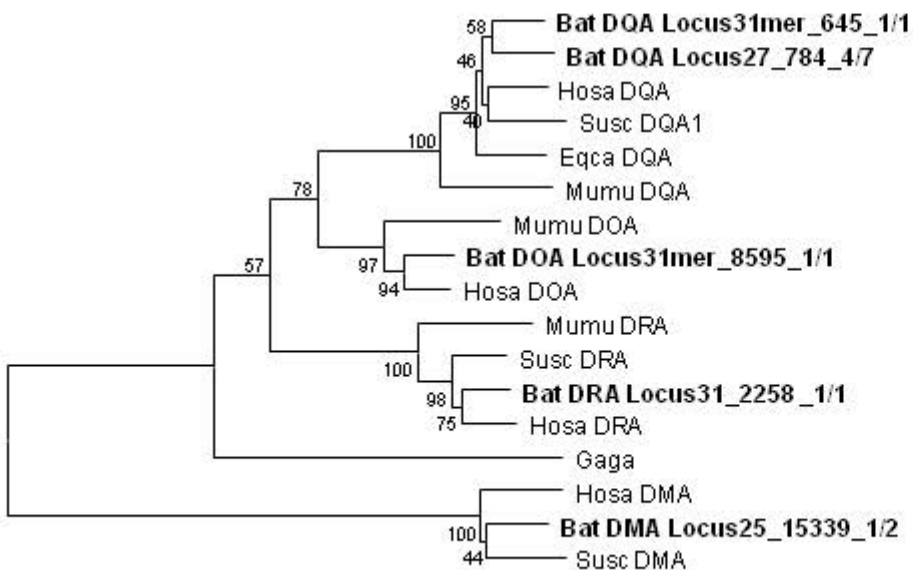

0.1

B

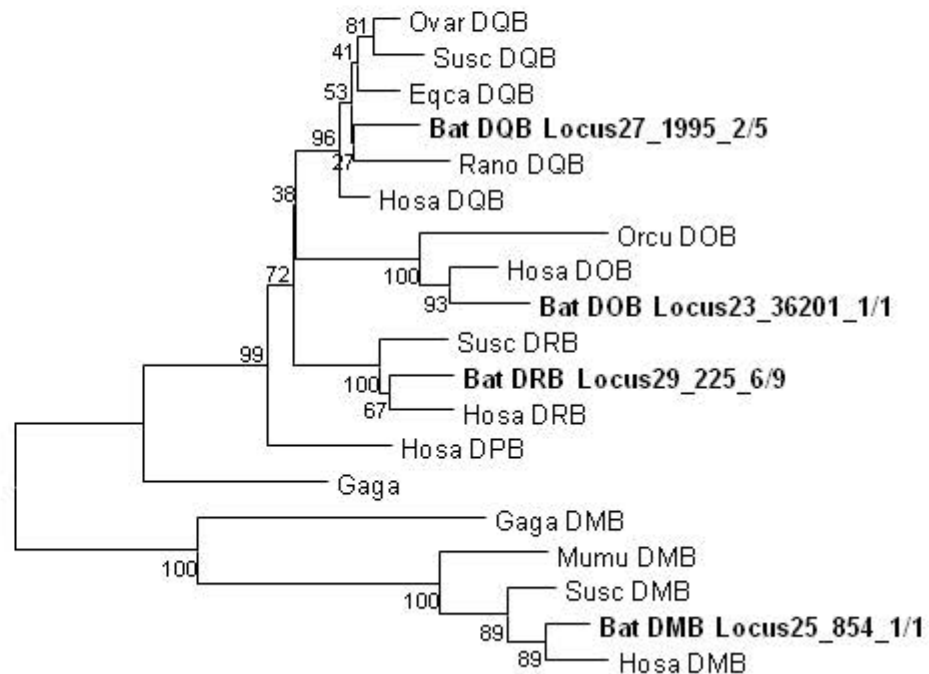

0.1
